# Supplementary material for: The Transition of Photoreceptor Guanylate Cyclase Type 1 to the Active State
Source: MDPI journal article supplement (doi:10.3390/ijms23074030), 2022-04-05
Supplement: s1 [file s1]

## Supplementary information

### The transition of photoreceptor guanylate cyclase type 1 to the active state

Manisha Kumari Shahu<sup>1</sup>, Fabian Schuhmann<sup>2</sup>, Alexander Scholten<sup>1</sup>, Ilia A. Solov'yov<sup>2,3</sup>, Karl-Wilhelm Koch<sup>1,3#</sup>

<sup>1</sup>Division of Biochemistry, Department of Neuroscience, University of Oldenburg, Oldenburg 26111, Germany.

<sup>2</sup>Institute of Physics, University of Oldenburg, Oldenburg 26111, Germany.

<sup>3</sup>Research Centre for Neurosensory Science, University of Oldenburg, Oldenburg 26111, Germany.

\*To whom correspondence should be addressed: [karl.w.koch@uni-oldenburg.de](mailto:karl.w.koch@uni-oldenburg.de)

**Table S1.** Oligonucleotide sequences used in the present study.

| Mutants                      | Oligonucleotide Sequence 5'-3'                                                                                                   |
|------------------------------|----------------------------------------------------------------------------------------------------------------------------------|
| 1 Alanine<br>(1Ala)          | <b>FP-</b> 5'- AGG CAC CGG CTA CTT CAC ATG CAA ATG -3'<br><b>RP-</b> 5'- <b>AGC</b> CAC ATA ATG GGC CAG GAA GGC -3'              |
| 2 Alanine<br>(2Ala)          | <b>FP-</b> 5'- AGG CAC CGG CTA CTT CAC ATG CAA ATG -3'<br><b>RP</b> 5'- <b>TGC AGC</b> CAC ATA ATG GGC CAG GAA GGC -3'           |
| 3 Alanine<br>(3Ala)          | <b>FP</b> 5'- <b>GCC</b> AGG CAC CGG CTA CTT CAC ATG -3'<br><b>RP</b> 5'- <b>TGC AGC</b> CAC ATA ATG GGC CAG GAA GGC -3'         |
| 4 Alanine<br>(4Ala)<br>Set a | <b>FP</b> 5'- <b>GCC GCT</b> AGG CAC CGG CTA CTT CAC ATG -3'<br><b>RP</b> 5'- <b>TGC AGC</b> CAC ATA ATG GGC CAG GAA GGC -3'     |
| 4 Alanine<br>(4Ala)<br>Set b | <b>FP</b> 5'- <b>GCC GCT GCT</b> AGG CAC CGG CTA CTT CAC ATG -3'<br><b>RP-</b> 5'- <b>AGC</b> CAC ATA ATG GGC CAG GAA GGC -3'    |
| 5 Alanine<br>(5Ala)          | <b>FP</b> 5'- <b>GCC GCT GCT</b> AGG CAC CGG CTA CTT CAC ATG -3'<br><b>RP</b> 5'- <b>TGC AGC</b> CAC ATA ATG GGC CAG GAA GGC -3' |

**Figure S1**

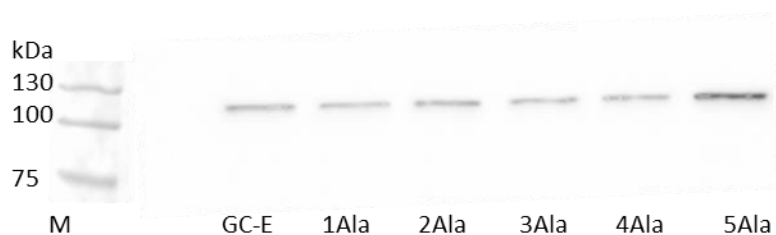

**Figure S1.** Western blot for verification and quantification of poly alanine mutants. Expression level of mutants was compared to that of GC-E wildtype in HEK293 cell membranes. Five  $\mu\text{g}$  of total protein amount for each sample was analysed by SDS-PAGE. The samples were detected by the specific antibody anti-GC1#3. The slight difference between each mutant band intensity was considered for the activity measurement of amount of cGMP synthesized with each sample.

**Figure S2**

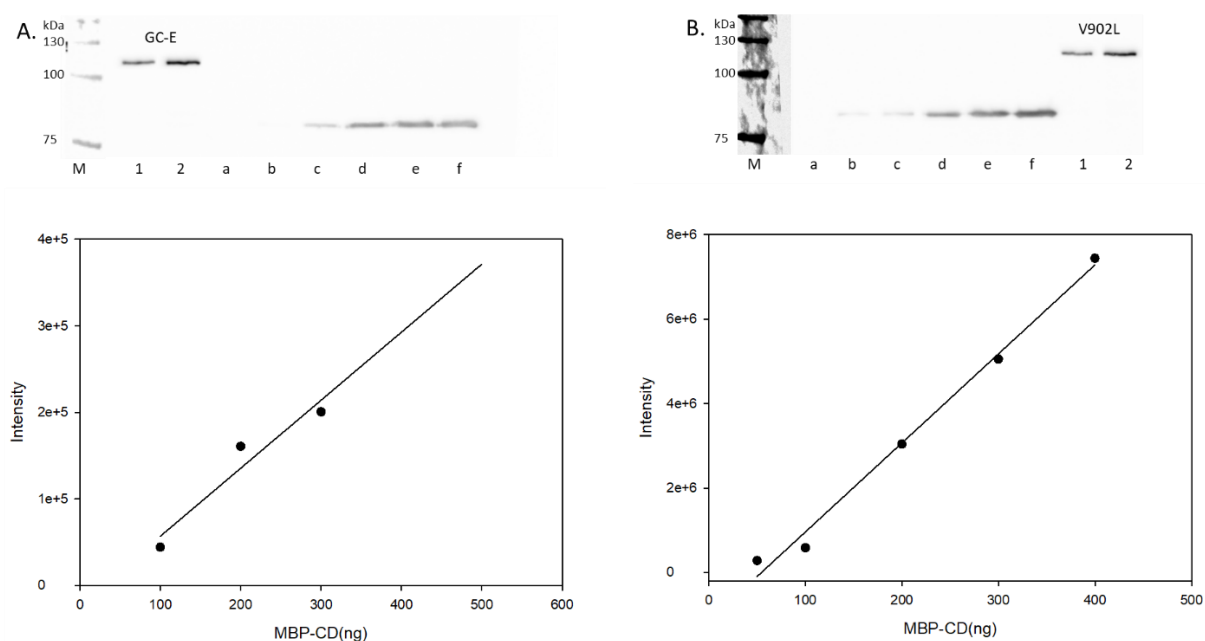

**Figure S2.** Quantification of GC-E and V902L in HEK293 cell membranes. Purified MBP-CD protein samples were electrophoresed and blotted in increasing amount (a- 20ng, b-50ng, c- 100ng, d-200ng, e-300ng, f-400ng) were used to create a calibration curve along with a sample of wildtype GC-E (**A**) or V902L (**B**) present in HEK293 membrane fractions (1- 2.5  $\mu\text{g}$ , 2- 5  $\mu\text{g}$ ). The samples were detected by GC1 # 3 antibody and ECL imaging. Band intensity was linear within the tested range for **B**, for **A** the plot was extended manually based on linearity. Quantification yielded for 5  $\mu\text{g}$  membrane protein 292 ng of GC-E wildtype, and 212 ng of V902L, taking a purity of 73% into account.
